# Supplementary material for: Safety and Efficacy of Ribociclib in Combination with Letrozole in Patients with HR+, HER2− Advanced Breast Cancer: Results from the Italian Subpopulation of Phase 3b CompLEEment-1 Study
Source: Springer Nature journal article supplement (doi:10.1007/s11523-022-00913-x), 2022-09-24

**Safety and Efficacy of Ribociclib in Combination with Letrozole in Patients with HR+, HER2– Advanced Breast Cancer: Results from the Italian Subpopulation of Phase 3b CompLEEment-1 Study**

Michelino De Laurentiis,<sup>1\*</sup> Roberta Caputo,<sup>2</sup> Manuelita Mazza,<sup>3</sup> Mauro Mansutti,<sup>4</sup> Riccardo Masetti,<sup>5</sup> Zelmira Ballatore,<sup>6</sup> Rosalba Torrisi,<sup>7</sup> Andrea Michelotti,<sup>8</sup> Alberto Zambelli,<sup>9</sup> Antonella Ferro,<sup>10</sup> Daniele Generali,<sup>11</sup> Patrizia Vici,<sup>12</sup> Luigi Coltelli,<sup>13</sup> Alessandra Fabi,<sup>14</sup> Paolo Marchetti,<sup>15</sup> Alberto Ballestrero,<sup>16</sup> Simon Spazzapan,<sup>17</sup> Antonio Frassoldati,<sup>18</sup> Maria Giuseppina Sarobba,<sup>19</sup> Donatella Grasso,<sup>20</sup> and Claudio Zamagni<sup>21</sup>

<sup>1</sup>Breast Oncology, Istituto Nazionale Tumori - IRCCS - Fondazione Pascale, Napoli, Italy.

Email: m.delautentiis@breastunit.org

<sup>2</sup>Istituto Nazionale Tumori "Fondazione Pascale", Napoli, Italy. Email: r.caputo@breastunit.org

<sup>3</sup>Senologia Medica, Istituto Europeo di Oncologia, Milano, Italy. Email: manuelita.mazza@ieo.it

<sup>4</sup> Department of Oncology, Santa Maria della Misericordia hospital, Udine, Italy.

Email: mansutti.mauro@aoud.sanita.fvg.it

<sup>5</sup>Dipartimento di Scienze della Salute della Donna e del Bambino e di Sanità Pubblica, Fondazione Policlinico Gemelli IRCSS, Roma, Italy. Email: riccardo.masetti@policlinicogemelli.it

<sup>6</sup>Clinica Oncologica e Centro Regionale di Genetica Oncologica, AOU Ospedali Riuniti Ancona Università Politecnica delle Marche, Ancona, Italy. Email: zelmira.ballatore@gmail.com

<sup>7</sup>IRCCS-Humanitas Clinical and Research Hospital, Dept of Medical Oncology, Rozzano, Italy.

Email: rosalba.torrisi@cancercenter.humanitas.it

<sup>8</sup>U.O. Oncologia Medica I, Azienda Ospedaliera Universitaria Pisana, Ospedale S. Chiara, Pisa, Italy.

Email: andre.michelotti@gmail.com

<sup>9</sup>Humanitas University - IRCCS Research Hospital, Rozzano, Italy. Email: alberto.zambelli@hunimed.eu

<sup>10</sup>Medical Oncology, Ospedale Santa Chiara, Trento, Italy. Email: antonella.ferro@apss.tn.it

<sup>11</sup>U.O.C. Multidisciplinare di Patologia Mammaria, Istituti Ospitalieri di Cremona, ASST di Cremona, Cremona, Italy.

Email: dgenerali@units.it

<sup>12</sup>UOSD Sperimentazioni di fase IV, IRCCS Regina Elena National Cancer Institute, Roma, Italy.

Email: patrizia.vici@ifo.it

<sup>13</sup>U.O.C. di Oncologia Medica, Presidio Ospedaliero Livorno, Livorno, Italy.

Email: luigi.coltelli@uslnordovest.toscana.it

<sup>14</sup>Division of Medical Oncology 1, IRCCS Regina Elena National Cancer Institute, Roma, Italy.

Email: [alessandra.fabi@policlinicogemelli.it](mailto:alessandra.fabi@policlinicogemelli.it)

<sup>15</sup>UOC Oncologia Medica, Azienda Ospedaliera St. Andrea, Rome, Italy. Email: [paolo.marchetti@uniroma1.it](mailto:paolo.marchetti@uniroma1.it)

<sup>16</sup>Dipartimento di Medicina Interna DIMI, Ospedale Policlinico San Martino IRCCS, Genova, Italy.

Email: [aballestrero@unige.it](mailto:aballestrero@unige.it)

<sup>17</sup>S.O.C. Oncologia Medica e Prevenzione Oncologica, Centro di Riferimento Oncologico IRCCS, Aviano, Italy.

Email: [spazzapan@cro.it](mailto:spazzapan@cro.it)

<sup>18</sup>U.O.C. Oncologia Clinica, Azienda Ospedaliero- Universitaria di Ferrara - Arcispedale Sant'Anna, Ferrara, Italy.

Email: [a.frassoldati@ospfe.it](mailto:a.frassoldati@ospfe.it)

<sup>19</sup>UOC Oncologia, Presidio Ospedaliero S. Francesco, ASL Nuoro, Nuoro, Italy. Email: [gi.sarobba@tiscali.it](mailto:gi.sarobba@tiscali.it)

<sup>20</sup>Oncology, Novartis Farma SpA, Origgio, Italy. Email: [donatella.grasso@novartis.com](mailto:donatella.grasso@novartis.com)

<sup>21</sup>Addarii Medical Oncology Unit IRCCS Azienda Ospedaliero-universitaria di Bologna, Bologna, Italy.

Email: [claudio.zamagni@aosp.bo.it](mailto:claudio.zamagni@aosp.bo.it)

\*Corresponding author

**Fig. S1** Change from baseline in FACT-B emotional well-being scores (patient-reported outcomes analysis set)

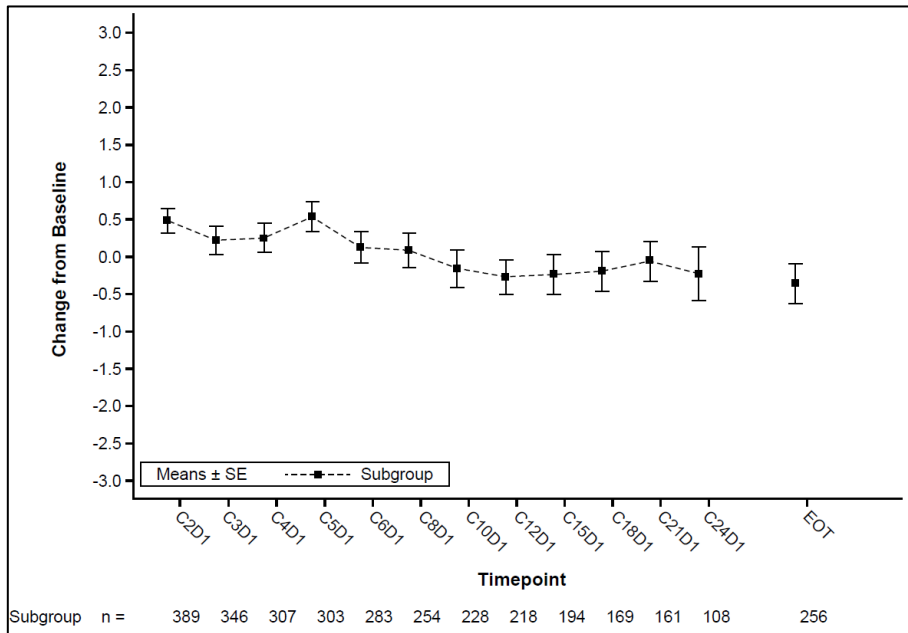

**Fig. S2** Change from baseline in FACT-B functional well-being scores (patient-reported outcomes analysis set)

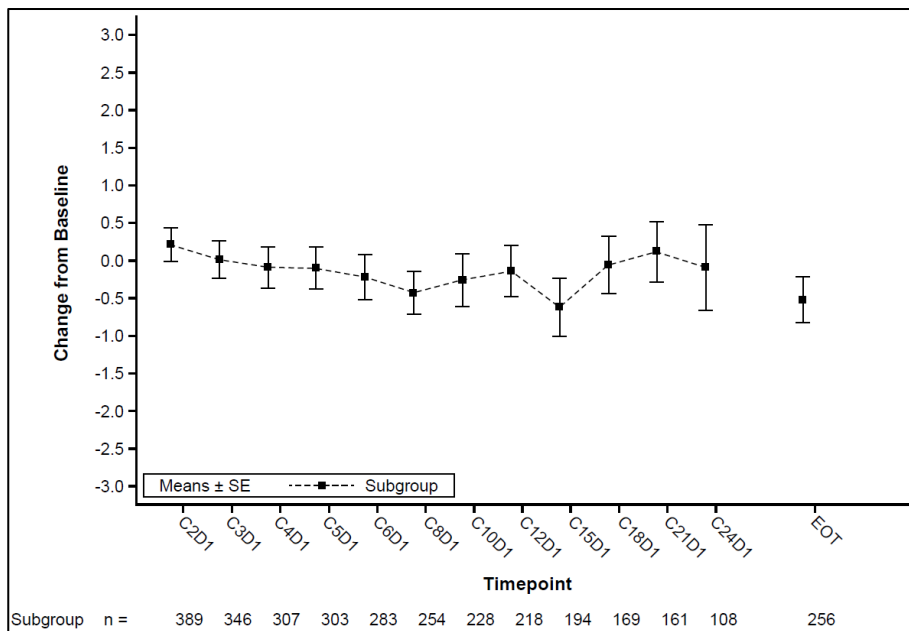

**Fig. S3** Change from baseline in FACT-B additional concerns scores (patient-reported outcomes analysis set)

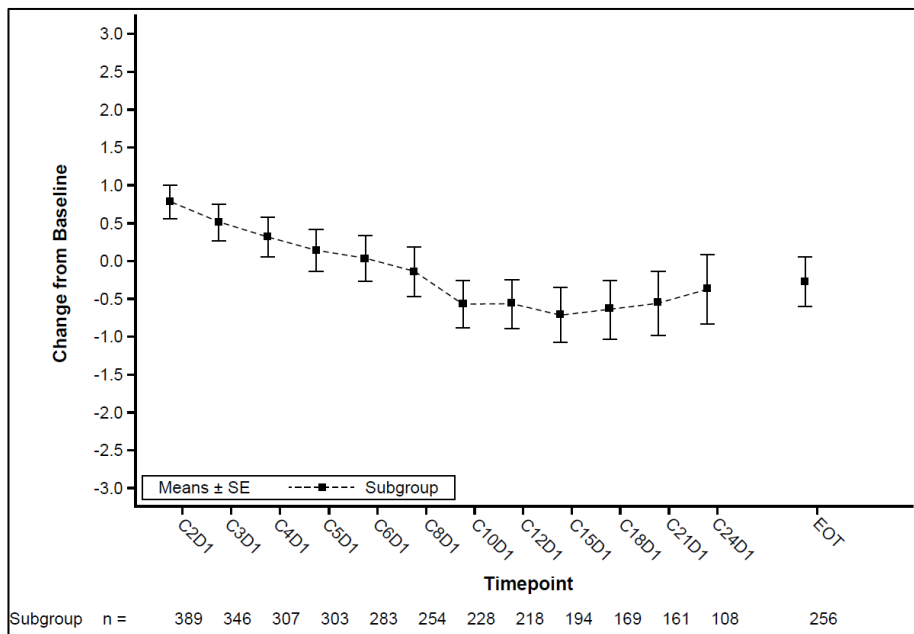

Supplement: MOESM1 [file 11523_2022_913_MOESM1_ESM.pdf]
